# Supplementary material
Source: Springer Nature journal article supplement (https://www.springermedizin.de/resource/supplementary/12899_2010_174_MOESM7_ESM.pdf/9514638)

### EDL 20 Hz

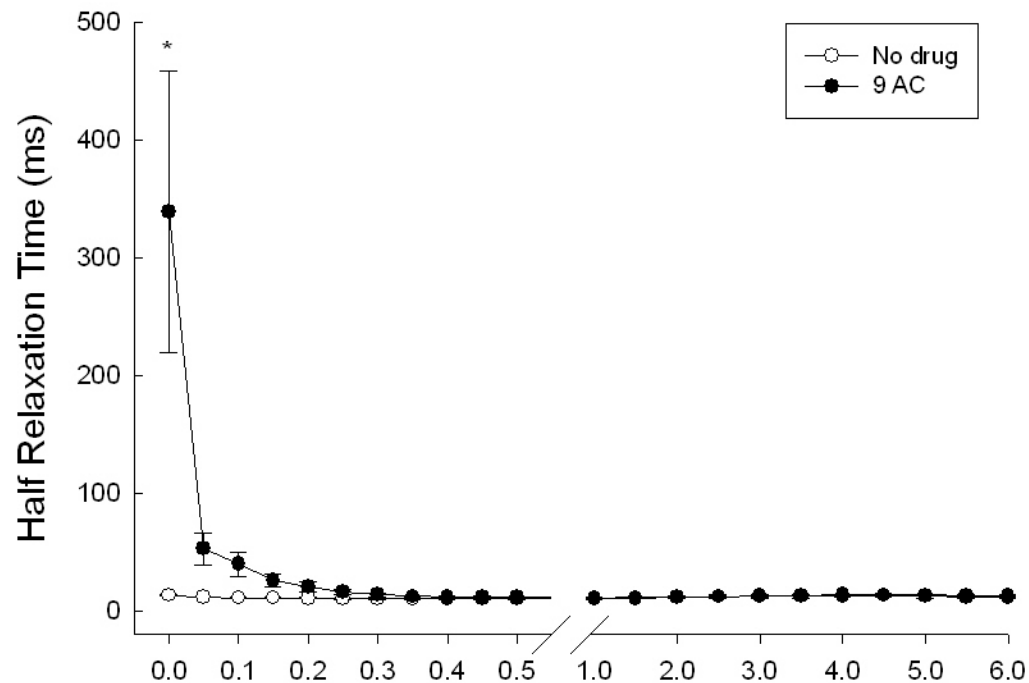

### EDL 50 Hz

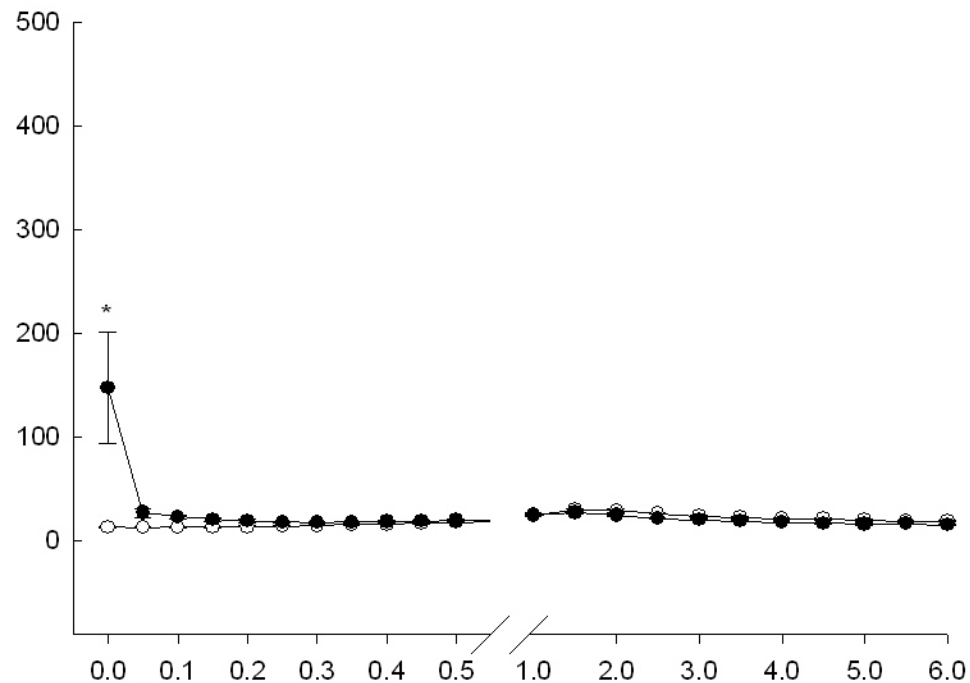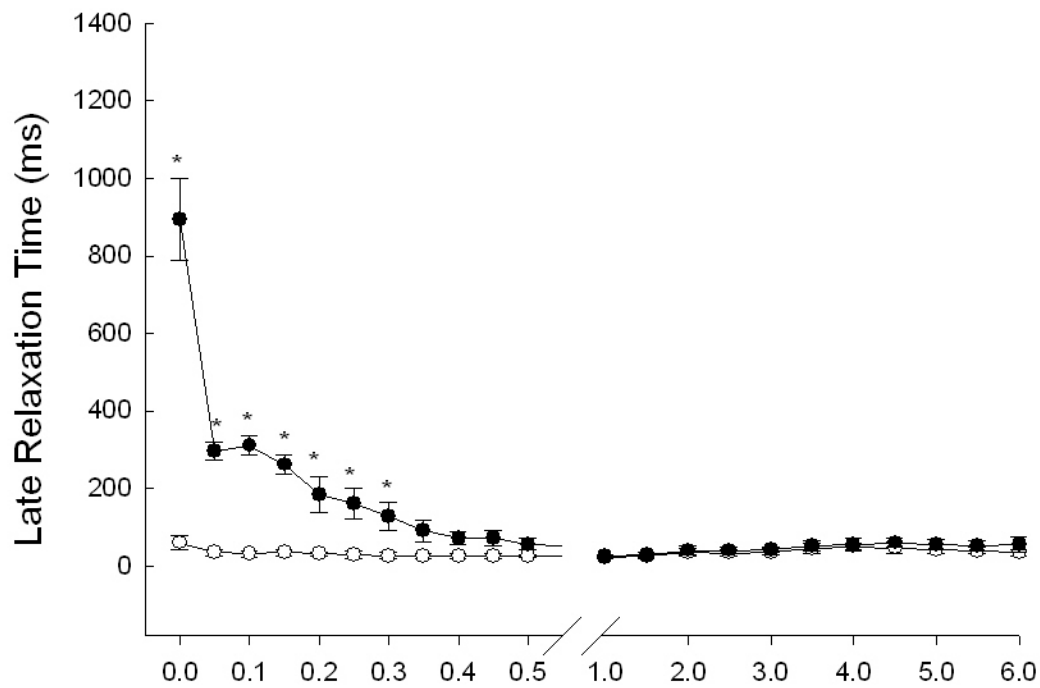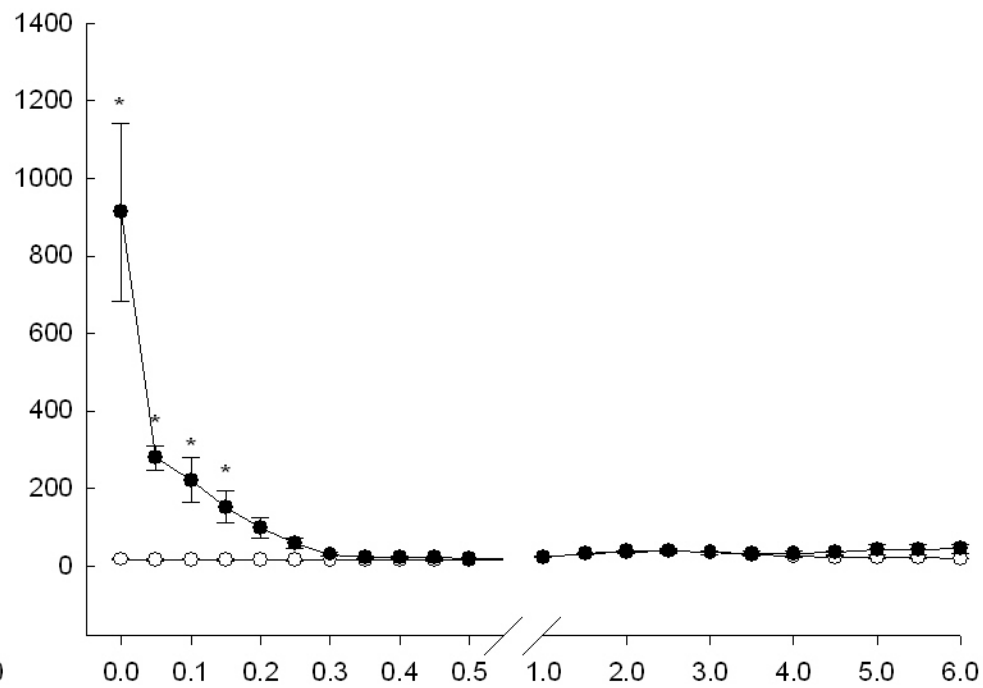

Time (min)

Supplement: MOESM7 [file 9514638]
